# Supplementary material for: Sediment bacterial assemblages inside and outside macrophyte beds in Yunnan Plateau lakes with contrasting nutrient levels and water depths
Source: Research Square preprint supplement (doi:10.21203/rs.3.rs-6075353/v1), 2025-04-21
Supplement: Supplementary file 1 [file aea7f4de4871e4ee4c450a79.xlsx]

## Sheet: Table S1
Table S1 Water depth for each sampling sites in the four studied lakes
Lakes	Sampling sites	depth(m)
Lugu	L2	60.1
	L8	29.3
	L14	0.76
	LY7	3.1
	LY9	5.8
	LY17	7.2
Chenghai	C2	9.8
	C5	15.3
	C14	12.1
	C16	24.7
	C18	26.8
	C19	23.9
Erhai	E1	10.2
	E7	8.7
	E13	13.9
	E16	12.3
	E24	7.8
	EY10	4.1
Qilu	Q1	2.1
	Q7	4.8
	Q10	4.5
	Q12	4.6
	QY1	1.6
	QY3	1.4
	QY5	4.3

## Sheet: Table S2
Table S2 Properties of sediment samples in different lakes
Lakes	Sampling sites	TN	TP	OM	Ca2-P	Ca8-P	Al-P	Fe-P	O-P	Ca10-P
Lugu	L2	5733.00±1005.52fgh	817.67±28.50efgh	317.00±14.00l	14.70±0.82abc	8.13±0.10a	17.60±0.75efg	48.43±2.08bcdefg	148.33±15.95abcd	690.00±12.00ijk
	L8	3632.00±62.65bcde	3100.33±108.35k	57.97±1.25cde	25.70±0.75defg	68.37±1.12h	13.23±1.21abcd	193.67±4.51k	178.77±138.12bcd	2361.00±100.37m
	L14	8447.33±2003.29i	755.00±72.11ef	285.33±9.29k	15.60±0.87abcd	8.49±0.47a	19.27±1.05fgh	44.77±1.53abcdefg	139.00±8.19abcd	541.33±15.95ghij
	LW17	2355.33±8.08abc	356.67±8.08abc	39.40±1.00abcd	6.77±0.15a	16.00±0.20bcde	16.90±0.61defg	47.53±0.76bcdefg	199.00±10.00cd	60.47±1.05a
	LY7	2342.00±286.07abc	678.67±310.00de	35.23±20.48abc	23.00±10.76bcdefg	13.63±2.90bcd	31.43±2.17j	12.97±1.55ab	227.33±121.14d	306.00±216.81bcde
	LY9	2686.33±44.79abcd	357.33±23.80abc	46.47±3.90bcde	17.05±6.77abcd	14.67±4.47bcde	15.17±0.40abcdef	53.70±49.59cdefghi	153.33±25.42abcd	116.43±11.54a
Chenghai	C2	1612.00±41.33ab	714.67±12.10ef	25.57±2.24ab	15.27±1.19abcd	17.47±0.74cde	26.50±0.92i	113.67±5.69j	133.33±5.51abcd	385.00±5.29defg
	C5	1558.00±89.44a	755.33±12.50ef	23.13±1.66ab	17.37±0.90abcd	18.27±1.07de	34.13±1.56j	10.20±0.85a	184.33±6.51bcd	430.00±10.00efgh
	C14	899.00±30.04a	613.00±55.05cde	11.40±1.15a	24.87±0.95bcdefg	34.77±1.88f	31.26±1.50j	18.43±1.10abcd	74.43±1.31ab	435.67±18.01efgh
	C16	2707.33±45.72abcd	1273.67±26.76j	47.47±2.14bcde	17.03±0.15abcd	56.03±0.45g	33.63±0.74j	16.90±0.75abc	72.60±0.92ab	1005.33±7.02l
	C18	2531.67±55.81abcd	783.00±10.58efg	44.00±0.90bcde	31.60±1.41gh	36.50±0.79f	14.53±0.70abcde	25.27±0.55abcd	121.00±10.54abcd	516.33±13.58gh
	C19	2596.33±152.22abcd	850.00±119.03efgh	46.03±1.80bcde	28.47±1.31efgh	18.17±0.60de	20.70±0.79gh	22.70±0.80abcd	134.00±5.57abcd	484.00±72.02fgh
Erhai	E1	2657.33±2007.30abcd	1157.67±45.18ij	39.97±29.24abcd	33.27±4.71ghi	14.20±2.00bcde	15.53±3.45abcdef	44.47±24.54abcdefg	129.20±29.93abcd	711.33±89.02jk
	E7	6528.33±55.61ghi	1205.00±63.32ij	94.37±0.60fg	25.20±0.66cdefg	15.70±0.53bcde	11.47±0.91a	87.33±1.12hij	188.33±3.51bcd	522.67±5.69ghi
	E13	4251.67±115.22cdef	1073.33±100.66hij	65.47±1.63def	16.63±0.91abcd	17.77±1.06cde	12.50±1.05abc	66.60±1.05efghi	225.33±8.08d	550.33±5.13ghijk
	E16	4544.00±167.65defg	1164.67±72.15ij	66.47±1.23def	24.43±0.75bcdefg	15.13±0.45bcde	16.53±0.83cdef	70.50±1.95fghi	182.67±12.86bcd	572.67±5.69hijk
	E24	4310.67±81.00cdef	1026.33±96.01ghij	70.57±1.92ef	20.33±1.01bcdef	18.47±0.81e	14.40±0.85abcde	41.23±1.11abcdef	151.67±6.66abcd	715.00±10.54k
	EY10	4242.00±1021.03cdef	845.67±100.90efgh	68.6±14.77def	23.00±7.64bcdefg	14.13±0.32bcde	14.47±2.44abcde	54.83±14.81defghi	163.67±8.62abcd	339.67±41.53cdef
Qilu	Q1	5366.67±111.27efgh	336.67±8.50ab	113.00±3.61gh	30.23±1.66fgh	11.67±0.80ab	12.60±0.75abc	38.47±1.50abcdef	77.97±1.53ab	135.33±1.53ab
	Q7	6046.33±184.58fgh	296.67±8.02a	141.33±3.51hi	19.37±0.45bcde	13.43±0.57bc	15.67±0.78bcdef	24.33±1.52abcd	48.27±3.40a	118.67±7.64a
	Q10	6556.33±121.50ghi	640.33±15.95de	113.00±4.00gh	43.87±1.51ij	13.30±1.55bc	17.30±0.53defg	33.40±1.35abcde	70.80±2.81ab	225.33±10.69abcd
	Q12	7147.00±68.64hi	652.67±16.26de	122.67±3.51ghi	80.33±2.52k	15.83±2.00bcde	14.87±1.05abcde	50.53±2.67cdefgh	118.33±6.03abcd	224.67±10.69abcd
	QY1	8478.00±211.54i	958.67±21.03fghi	216.67±18.77j	51.87±4.19j	14.40±1.08bcde	12.13±1.05ab	87.80±1.61ij	79.77±1.50abc	558.33±23.71hijk
	QY3	5241.00±104.33efgh	587.33±10.07bcde	127.33±5.69hi	14.40±1.08ab	15.00±1.85bcde	21.73±0.96h	13.30±1.44ab	90.00±1.64abc	381.00±14.53defg
	QY5	6538.33±90.67ghi	431.33±3.51abcd	143.33±5.51i	38.43±0.71hi	12.57±0.86ab	18.30±0.95efgh	79.63±6.52ghij	92.67±4.04abc	180.67±10.02abc

## Sheet: Table S3
Table S3 Bacterial community composition at phylum level in four major lakes
Taxon	Chenghai_average	Erhai_average	Lugu_average	Qilu_average	pvalue
	Relative abundance(%)	Relative abundance(%)	Relative abundance(%)	Relative abundance(%)
Proteobacteria	48.9763	50.4004	45.297	35.5871	3.786×10-4
Firmicutes	20.3278	7.17459	9.86114	25.0219	6.600×10-7
Chloroflexi	13.079	10.8392	13.4087	12.3447	1.934×10-2
Bacteroidetes	7.94135	6.11773	5.91681	6.9896	4.036×10-3
Acidobacteria	1.49023	6.04943	5.19335	4.14452	1.675×10-9
Nitrospirae	1.27879	6.39954	6.47135	2.34397	1.511×10-4
Planctomycetes	1.31573	2.56045	1.8061	4.44503	6.881×10-9
Actinobacteria	2.38086	2.65646	2.18678	1.62751	7.126×10-5
Euryarchaeota	0.220509	1.33277	2.19219	1.46621	1.737×10-6
Crenarchaeota	0.0589086	0.962279	1.30825	0.714272	6.324×10-8
Nitrospinae	0.0904326	1.91262	0.702763	0.13251	9.221×10-11
Latescibacteria	0.213185	0.704992	1.00765	0.742112	1.078×10-8
Spirochaetes	0.263974	0.473657	0.81867	0.97397	2.910×10-8
Patescibacteria	0.539093	0.206817	0.386249	0.661459	1.257×10-6
Verrucomicrobia	0.139948	0.506614	0.541163	0.438744	2.759×10-7
Gemmatimonadetes	0.15364	0.0557243	0.235157	0.167855	6.724×10-5
Armatimonadetes	0.0902734	0.118136	0.166058	0.176043	1.305×10-3
Calditrichaeota	0.0587494	0.0582717	0.170357	0.201699	1.494×10-7
Rokubacteria	0.0687797	0.167969	0.166854	0.0476272	4.181×10-9

## Sheet: Table S4
Table S4 Bacterial community composition at genus level in four major lakes
Phylum	Genus	Lake Lugu	Lake Chenghai	Lake Erhai	Lake Qilu	pvalue
		Relative abundance(%)	Relative abundance(%)	Relative abundance(%)	Relative abundance(%)
decreased
Proteobacteria	Psychrobacter	4.84977	3.15065	0.787305	0.000545871	1.715×10-2
Firmicutes	Carnobacterium	0.810709	0.146953	0.0519032	0.0046399	1.964×10-4
Firmicutes	Brochothrix	0.655955	0.0786509	0.000955274	0	1.363×10-2
Proteobacteria	Geobacter	0.495469	0.0819944	0.217325	0.0839277	9.151×10-8
Nitrospirae	Nitrospira	0.397872	0.0925024	0.0800838	0.0289312	3.272×10-4
Firmicutes	Exiguobacterium	0.348357	0.0641626	0.0162397	0.048719	9.849×10-2
Proteobacteria	Syntrophobacter	0.334983	0.0940945	0.144565	0.0960733	1.654×10-5
Euryarchaeota	Methanoregula	0.243595	0.0163989	0.196946	0.0818806	1.024×10-8
First increased and then decreased
Proteobacteria	Thiobacillus	0.842393	8.21647	1.57493	3.37935	1.226×10-7
Proteobacteria	Crenothrix	0.716137	0.354884	3.63211	0.25383	6.120×10-18
Proteobacteria	Desulfatiglans	0.5781	0.532725	1.34519	1.29999	7.686×10-13
Bacteroidetes	Flavobacterium	0.522853	5.04082	0.0399623	0.00668692	3.844×10-2
Proteobacteria	Syntrophorhabdus	0.477478	1.26956	0.317151	0.31988	1.711×10-8
Acidobacteria	Thermoanaerobaculum	0.345332	0.0351859	0.49722	0.168128	1.363×10-5
Proteobacteria	Desulfobacca	0.325908	0.211912	0.623157	0.305824	6.862×10-8
Proteobacteria	Comamonas	0.308076	0.0843825	0.37399	0.181229	4.965×10-8
Proteobacteria	Polaromonas	0.285945	0.930755	0.0159212	0.000272935	6.269×10-3
Bacteroidetes	Ignavibacterium	0.283876	0.373353	0.661527	0.405309	1.430×10-8
Chloroflexi	Pelolinea	0.280851	0.964349	0.246938	0.392754	2.378×10-8
Actinobacteria	Gaiella	0.234997	0.28706	0.109857	0.0247007	1.430×10-6
Proteobacteria	Methyloparacoccus	0.184049	0.0358228	0.234679	0.0855653	2.355×10-5
Proteobacteria	Lautropia	0.0370965	0.108901	0.17577	0.114633	2.302×10-12
Bacteroidetes	Actibacter	0.0363004	0.0130554	1.3697	0.283989	2.612×10-6
Euryarchaeota	Methanobacterium	0.0297727	0.0350267	0.346287	0.0403944	6.536×10-14
Proteobacteria	Halioglobus	0.053973	0.0834273	0.28308	0.0682339	3.121×10-9
Planctomycetes	Pirellula	0.195354	0.352337	0.23452	0.267204	8.742×10-3
increased
Proteobacteria	Candidatus	0.18389	0.270502	0.33546	1.90877	4.357×10-19
Chloroflexi	Anaerolinea	0.0789693	0.0759443	0.151252	0.495787	1.603×10-16
Chloroflexi	Leptolinea	0.0625705	0.0340714	0.145361	0.544916	2.102×10-23
Firmicutes	Sporacetigenium	0.0493558	0.00541322	0.135012	5.83481	7.206×10-7
Firmicutes	Bacillus	0.00668692	0.00732377	0.0162397	6.96122	2.173×10-8

## Sheet: Table S5
Table S5 Functional clusters in all samples
Taxon	Lugu_average	Chenghai_average	Erhai_average	Qilu_average	pvalue
	Relative abundance(%)	Relative abundance(%)	Relative abundance(%)	Relative abundance(%)
[J] Translation, ribosomal structure and biogenesis	11.4256	10.5432	11.0521	10.8748	8.010×10-6
[H] Coenzyme transport and metabolism	6.929	6.46646	6.85122	6.646	2.100×10-4
[E] Amino acid transport and metabolism	8.87975	9.01082	8.67654	8.7202	1.843×10-4
[M] Cell wall/membrane/envelope biogenesis	7.9311	7.45065	8.08032	7.64484	3.400×10-4
[C] Energy production and conversion	7.15997	6.83607	7.30467	7.1396	6.890×10-5
[R] General function prediction only	6.25381	6.6107	6.18853	6.41017	2.350×10-6
[K] Transcription	5.22672	5.83343	5.16315	5.46757	1.150×10-6
[O] Post-translational modification, protein turnover, and chaperones	5.37308	5.38123	5.50658	5.42419	1.239×10-1
[T] Signal transduction mechanisms	5.10751	5.17822	5.2758	5.34991	6.854×10-4
[P] Inorganic ion transport and metabolism	5.02874	5.25692	5.12179	5.12902	1.906×10-2

## Sheet: Table S6
Table S6 Sequencing information and alpha-diversity variables for bacterial community
Lakes	Sampling sites	Chao1	Simpson	Shannon_2	Shannon_e	High quality reads	Good-coverage(%)
Lugu	L2.1	1690.1	0.0169	7.91	5.49	91394	99.5
	L2.2	1691.3	0.0182	7.85	5.44	84846	99.4
	L2.3	1723.2	0.0167	8.02	5.56	89916	99.4
	L8.1	1790.2	0.0236	7.82	5.42	91188	99.5
	L8.2	1795.4	0.0221	7.84	5.44	91032	99.5
	L8.3	1826.2	0.0474	7.37	5.11	89140	99.5
	L14.1	2156.9	0.00783	8.9	6.17	89697	99.4
	L14.2	2182.2	0.00741	9.01	6.25	87817	99.4
	L14.3	2201	0.00399	9.31	6.46	91801	99.4
	LW17.1	1770.3	0.0671	7.02	4.86	91918	99.4
	LW17.2	1797.6	0.0649	7.03	4.87	87647	99.4
	LW17.3	1757.4	0.0482	7.25	5.02	89958	99.4
	LY7.1	1693.1	0.0391	7.27	5.04	90431	99.4
	LY7.2	1842.2	0.0226	7.96	5.52	91487	99.4
	LY7.3	1727.5	0.063	6.96	4.82	84717	99.4
	LY9.1	1876.9	0.0217	7.98	5.53	89481	99.4
	LY9.2	1913	0.0318	7.81	5.42	87177	99.4
	LY9.3	1938.9	0.0303	7.87	5.46	91307	99.4
Chenghai	C2.1	1035.1	0.258	4.11	2.85	91019	99.4
	C2.2	1162.7	0.0829	5.45	3.78	84207	99.4
	C2.3	1290.7	0.0708	5.9	4.09	91089	99.4
	C5.1	1474.4	0.0379	7.02	4.86	89447	99.4
	C5.2	1349.8	0.0428	6.55	4.54	92200	99.4
	C5.3	1432.5	0.0437	6.84	4.74	86840	99.5
	C14.1	1024.7	0.117	4.71	3.26	89610	99.5
	C14.2	1207	0.108	5.48	3.8	86450	99.5
	C14.3	1172.8	0.097	5.38	3.73	88644	99.4
	C16.1	1461.3	0.0365	6.9	4.78	91337	99.5
	C16.2	1501.1	0.0561	6.7	4.65	88378	99.5
	C16.3	1435.9	0.0833	6.17	4.28	91224	99.5
	C18.1	1364.3	0.0661	6.24	4.33	91058	99.4
	C18.2	1528.6	0.0534	6.79	4.71	85363	99.4
	C18.3	1453.1	0.0544	6.5	4.51	84279	99.4
	C19.1	1268.6	0.095	5.86	4.06	85260	99.5
	C19.2	1385.9	0.0403	6.83	4.74	86697	99.5
	C19.3	1333.6	0.0531	6.5	4.5	91984	99.4
Erhai	E1.1	1536.2	0.0253	7.32	5.08	89341	99.4
	E1.2	1674.4	0.0134	7.9	5.48	88093	99.4
	E1.3	1739.2	0.0157	7.84	5.43	86947	99.3
	E7.1	1625	0.0276	7.43	5.15	91848	99.4
	E7.2	1704.2	0.0131	7.95	5.51	89549	99.4
	E7.3	1793.1	0.0113	8.16	5.66	89498	99.4
	E13.1	2011.2	0.00952	8.6	5.96	89321	99.4
	E13.2	1572.1	0.0772	6.46	4.48	91739	99.4
	E13.3	1908.3	0.0233	8.02	5.56	90040	99.4
	E16.1	1887.1	0.00982	8.41	5.83	84658	99.5
	E16.2	1900.1	0.0111	8.38	5.81	87369	99.4
	E16.3	1873.9	0.0111	8.32	5.76	86516	99.3
	E24.1	1819.2	0.0175	7.87	5.46	87611	99.4
	E24.2	1846	0.016	7.92	5.49	89933	99.4
	E24.3	1863.8	0.0145	8.06	5.58	85715	99.4
	EY10.1	1859.2	0.0175	8	5.54	83933	99.4
	EY10.2	1780	0.0162	8.02	5.56	84186	99.4
	EY10.3	1798.9	0.0156	8.01	5.55	85075	99.4
Qilu	Q1.1	2003.6	0.0557	7.33	5.08	84749	99.4
	Q1.2	2061.1	0.0207	8.22	5.7	86428	99.4
	Q1.3	1931.5	0.0939	6.95	4.82	87521	99.4
	Q7.1	1784.4	0.0632	6.9	4.78	89815	99.4
	Q7.2	1725.1	0.0676	6.68	4.63	90204	99.4
	Q7.3	1977.4	0.0175	8.15	5.65	91687	99.3
	Q10.1	1829.6	0.0451	7.36	5.1	89028	99.4
	Q10.2	1950.5	0.0186	8.05	5.58	86703	99.4
	Q10.3	1945.8	0.0244	7.92	5.49	90347	99.4
	Q12.1	2012.5	0.0337	7.91	5.48	91046	99.4
	Q12.2	1981.1	0.0206	8.08	5.6	91353	99.4
	Q12.3	2075.4	0.0108	8.5	5.89	90184	99.4
	QY1.1	2103.3	0.0223	8	5.55	87837	99.4
	QY1.2	1839.3	0.13	5.97	4.14	85575	99.4
	QY1.3	2151.4	0.0237	8.1	5.61	85072	99.4
	QY3.1	2056.3	0.0337	7.75	5.37	89431	99.4
	QY3.2	2203.1	0.0222	8.28	5.74	89715	99.4
	QY3.3	2100.4	0.0316	7.83	5.43	87999	99.4
	QY5.1	1863.1	0.0414	7.27	5.04	90753	99.4
	QY5.2	1907.7	0.0416	7.26	5.03	87138	99.4
	QY5.3	1918	0.0368	7.29	5.05	85779	99.4

## Sheet: Table S7
Table S7 Forward Selection Results of Redundancy analysis (RDA)
Name	Explains %	Contribution %	pseudo-F	P value
Chl a	19.9	38.3	18.2	0.002
Al-P	7.9	15.3	7.9	0.002
ZSD	4.1	7.9	4.3	0.002
Total N	4	7.7	4.4	0.002
Ca10-P	2.9	5.6	3.3	0.002
Total P	3.8	7.3	4.5	0.002
Ca8-P	3.3	6.3	4	0.002
Ca2-P	2.2	4.2	2.8	0.004
Fe-P	1.6	3.1	2.1	0.004
OM	1.4	2.6	1.8	0.016
Sum	51.1	98.3
